# Supplementary material for: Results of targeted next-generation sequencing in children with cystic kidney diseases often change the clinical diagnosis
Source: PubMed Central journal article supplement (PMC7310724; doi:10.1371/journal.pone.0235071), 2020-06-23
Supplement: pone.0235071.s001.pdf [file pone.0235071.s001.pdf]

|                 |              |
|-----------------|--------------|
| <i>ACTN4</i>    | NM_004924    |
| <i>AHI1</i>     | NM_017651    |
| <i>ALMS1</i>    | NM_015120    |
| <i>ANKS6</i>    | NM_173551    |
| <i>ANLN</i>     | NM_018685    |
| <i>APOL1</i>    | NM_003661    |
| <i>ARHGDI1A</i> | NM_001185077 |
| <i>ARL13B</i>   | NM_182896    |
| <i>ARL6</i>     | NM_032146    |
| <i>B9D1</i>     | NM_015681    |
| <i>B9D2</i>     | NM_030578    |
| <i>BBIP1</i>    | NM_001195304 |
| <i>BBS1</i>     | NM_024649    |
| <i>BBS10</i>    | NM_024685    |
| <i>BBS12</i>    | NM_152618    |
| <i>BBS2</i>     | NM_031885    |
| <i>BBS4</i>     | NM_033028    |
| <i>BBS5</i>     | NM_152384    |
| <i>BBS7</i>     | NM_176824    |
| <i>BBS9</i>     | NM_198428    |
| <i>BICC1</i>    | NM_001080512 |
| <i>BVES</i>     | NM_007073    |
| <i>C3</i>       | NM_000064    |
| <i>CC2D2A</i>   | NM_001080522 |
| <i>CD2AP</i>    | NM_012120    |
| <i>CD46</i>     | NM_002389    |
| <i>CEP164</i>   | NM_014956    |
| <i>CEP290</i>   | NM_025114    |
| <i>CEP41</i>    | NM_018718    |
| <i>CFB</i>      | NM_001710    |
| <i>CFI</i>      | NM_000204    |
| <i>CLCNKB</i>   | NM_000085    |
| <i>COL4A3</i>   | NM_000091    |
| <i>COL4A4</i>   | NM_000092    |
| <i>COL4A5</i>   | NM_000495    |
| <i>COQ8B</i>    | NM_024876    |
| <i>CPLANE1</i>  | NM_023073    |
| <i>CRB2</i>     | NM_173689    |
| <i>DGKE</i>     | NM_003647    |
| <i>DYNC2H1</i>  | NM_001080463 |
| <i>EMP2</i>     | NM_001424    |
| <i>EYA1</i>     | NM_000503    |
| <i>GDNF</i>     | NM_000514    |
| <i>GFRA1</i>    | NM_005264    |
| <i>GLIS2</i>    | NM_032575    |
| <i>HNF1B</i>    | NM_000458    |
| <i>IFT140</i>   | NM_014714    |
| <i>IFT172</i>   | NM_015662    |

|                 |              |
|-----------------|--------------|
| <i>IFT27</i>    | NM_001177701 |
| <i>IFT80</i>    | NM_020800    |
| <i>INF2</i>     | NM_022489    |
| <i>INVS</i>     | NM_014425    |
| <i>IQCB1</i>    | NM_001023570 |
| <i>KCNJ1</i>    | NM_000220    |
| <i>KIF14</i>    | NM_014875    |
| <i>KIF7</i>     | NM_198525    |
| <i>LAMC1</i>    | NM_002292    |
| <i>LMX1B</i>    | NM_002316    |
| <i>LZTFL1</i>   | NM_020347    |
| <i>MKKS</i>     | NM_018848    |
| <i>MKS1</i>     | NM_017777    |
| <i>MUC1</i>     | NM_002456    |
| <i>MYH9</i>     | NM_002473    |
| <i>MYO1E</i>    | NM_004998    |
| <i>NAT8</i>     | NM_000169    |
| <i>NEK8</i>     | NM_178170    |
| <i>NPHP1</i>    | NM_000272    |
| <i>NPHP3</i>    | NM_153240    |
| <i>NPHP4</i>    | NM_015102    |
| <i>NPHS1</i>    | NM_004646    |
| <i>NPHS2</i>    | NM_014625    |
| <i>OFD1</i>     | NM_003611    |
| <i>PAX2</i>     | NM_003990    |
| <i>PEX1</i>     | NM_000466    |
| <i>PEX10</i>    | NM_153818    |
| <i>PEX11B</i>   | NM_003846    |
| <i>PEX13</i>    | NM_002618    |
| <i>PEX14</i>    | NM_004565    |
| <i>PEX16</i>    | NM_057174    |
| <i>PEX19</i>    | NM_002857    |
| <i>PEX2</i>     | NM_000318    |
| <i>PEX26</i>    | NM_017929    |
| <i>PEX3</i>     | NM_003630    |
| <i>PEX5</i>     | NM_001300789 |
| <i>PEX6</i>     | NM_000287    |
| <i>PKD1</i>     | NM_001009944 |
| <i>PKD2</i>     | NM_000297    |
| <i>PKHD1</i>    | NM_138694    |
| <i>PLCE1</i>    | NM_016341    |
| <i>PMPCA</i>    | NM_019892    |
| <i>PTPRO</i>    | NM_030667    |
| <i>REN</i>      | NM_000537    |
| <i>RET</i>      | NM_020975    |
| <i>RPGRIP1L</i> | NM_015272    |
| <i>SDCCAG8</i>  | NM_006642    |
| <i>SLC12A1</i>  | NM_000338    |

|                |              |
|----------------|--------------|
| <i>SLC12A3</i> | NM_000339    |
| <i>TCTN1</i>   | NM_001082538 |
| <i>TCTN2</i>   | NM_024809    |
| <i>TCTN3</i>   | NM_015631    |
| <i>THBD</i>    | NM_000361    |
| <i>TMEM138</i> | NM_001044385 |
| <i>TMEM216</i> | NM_016499    |
| <i>TMEM231</i> | NM_001077416 |
| <i>TMEM237</i> | NM_152388    |
| <i>TMEM67</i>  | NM_153704    |
| <i>TRIM32</i>  | NM_012210    |
| <i>TRPC6</i>   | NM_004621    |
| <i>TSC1</i>    | NM_000368    |
| <i>TSC2</i>    | NM_000548    |
| <i>TTC21B</i>  | NM_024753    |
| <i>TTC8</i>    | NM_144596    |
| <i>UMOD</i>    | NM_003361    |
| <i>VHL</i>     | NM_000551    |
| <i>WDPCP</i>   | NM_015910    |
| <i>WDR19</i>   | NM_025132    |
| <i>WT1</i>     | NM_024426    |
| <i>ZNF423</i>  | NM_015069    |
