# Supplementary material for: Results of targeted next-generation sequencing in children with cystic kidney diseases often change the clinical diagnosis
Source: PubMed Central journal article supplement (PMC7310724; doi:10.1371/journal.pone.0235071), 2020-06-23
Supplement: pone.0235071.s002.pdf [file pone.0235071.s002.pdf]

|                 |                |
|-----------------|----------------|
| <i>ACE</i>      | NM_000789.3    |
| <i>ACTN4</i>    | NM_001322033.1 |
| <i>AGT</i>      | NM_000029.3    |
| <i>AGTR1</i>    | NM_000685.4    |
| <i>AGXT</i>     | NM_000030.2    |
| <i>AHI1</i>     | NM_017651.4    |
| <i>ANKS6</i>    | NM_173551.4    |
| <i>ANLN</i>     | NM_018685.4    |
| <i>APOL1</i>    | NM_145343.2    |
| <i>AQP2</i>     | NM_000486.5    |
| <i>ARHGDI1</i>  | NM_004309.5    |
| <i>ARL13B</i>   | NM_182896.2    |
| <i>ARL6</i>     | NM_032146.5    |
| <i>ATP6V0A4</i> | NM_020632.2    |
| <i>ATP6V1B1</i> | NM_001692.3    |
| <i>AVP</i>      | NM_000490.4    |
| <i>AVPR2</i>    | NM_000054.4    |
| <i>B9D1</i>     | NM_015681.4    |
| <i>B9D2</i>     | NM_030578.3    |
| <i>BBIP1</i>    | NM_001195305.1 |
| <i>BBS1</i>     | NM_024649.4    |
| <i>BBS10</i>    | NM_024685.3    |
| <i>BBS12</i>    | NM_152618.2    |
| <i>BBS2</i>     | NM_031885.3    |
| <i>BBS4</i>     | NM_033028.4    |
| <i>BBS5</i>     | NM_152384.2    |
| <i>BBS7</i>     | NM_018190.3    |
| <i>BBS9</i>     | NM_001033604.1 |
| <i>BICC1</i>    | NM_001080512.2 |
| <i>BMP4</i>     | NM_001202.5    |
| <i>BSND</i>     | NM_057176.2    |
| <i>C3</i>       | NM_000064.3    |
| <i>CASR</i>     | NM_000388.3    |
| <i>CC2D2A</i>   | NM_001080522.2 |
| <i>CD2AP</i>    | NM_012120.2    |
| <i>CD46</i>     | NM_172361.2    |
| <i>CEP104</i>   | NM_014704.3    |
| <i>CEP164</i>   | NM_014956.4    |
| <i>CEP41</i>    | NM_018718.2    |
| <i>CFB</i>      | NM_001710.5    |
| <i>CFH</i>      | NM_000186.3    |
| <i>CFHR1</i>    | NM_002113.2    |
| <i>CFHR3</i>    | NM_021023.5    |
| <i>CFHR5</i>    | NM_030787.3    |
| <i>CFI</i>      | NM_000204.4    |
| <i>CLCNKA</i>   | NM_001042704.1 |
| <i>CLCNKB</i>   | NM_000085.4    |
| <i>CLDN16</i>   | NM_006580.3    |

|                |                |
|----------------|----------------|
| <i>CLDN19</i>  | NM_148960.2    |
| <i>COL4A1</i>  | NM_001303110.1 |
| <i>COL4A2</i>  | NM_001846.3    |
| <i>COL4A3</i>  | NM_000091.4    |
| <i>COL4A4</i>  | NM_000092.4    |
| <i>COL4A5</i>  | NM_000495.4    |
| <i>COL4A6</i>  | NM_001287758.1 |
| <i>COQ2</i>    | NM_015697.8    |
| <i>COQ6</i>    | NM_182476.2    |
| <i>COQ8B</i>   | NM_024876.3    |
| <i>CPLANE1</i> | NM_023073.3    |
| <i>CRB2</i>    | NM_173689.6    |
| <i>DGKE</i>    | NM_003647.2    |
| <i>DSTYK</i>   | NM_015375.2    |
| <i>DYNC2H1</i> | NM_001080463.1 |
| <i>DZIP1L</i>  | NM_173543.2    |
| <i>EMP2</i>    | NM_001424.5    |
| <i>EYA1</i>    | NM_000503.5    |
| <i>FGF20</i>   | NM_019851.2    |
| <i>FN1</i>     | NM_212476.2    |
| <i>FRAS1</i>   | NM_001166133.1 |
| <i>FREM1</i>   | NM_144966.5    |
| <i>GANAB</i>   | NM_198334.2    |
| <i>GATA3</i>   | NM_001002295.1 |
| <i>GLIS2</i>   | NM_032575.2    |
| <i>GRHPR</i>   | NM_012203.1    |
| <i>GRIP1</i>   | NM_001178074.1 |
| <i>HNF1B</i>   | NM_000458.3    |
| <i>HOGA1</i>   | NM_138413.3    |
| <i>CHD1L</i>   | NM_004284.5    |
| <i>IFT80</i>   | NM_020800.2    |
| <i>INF2</i>    | NM_022489.3    |
| <i>INVS</i>    | NM_014425.4    |
| <i>IQCB1</i>   | NM_001023570.3 |
| <i>ITGA8</i>   | NM_003638.2    |
| <i>KCNJ1</i>   | NM_000220.4    |
| <i>KIF7</i>    | NM_198525.2    |
| <i>LAMC1</i>   | NM_002292.3    |
| <i>LMX1B</i>   | NM_001174146.1 |
| <i>LRP5</i>    | NM_002335.3    |
| <i>LZTFL1</i>  | NM_020347.3    |
| <i>MAGED2</i>  | NM_014599.5    |
| <i>MKKS</i>    | NM_018848.3    |
| <i>MKS1</i>    | NM_017777.3    |
| <i>MUC1</i>    | NM_002456.5    |
| <i>MYH9</i>    | NM_002473.5    |
| <i>MYO1E</i>   | NM_004998.3    |
| <i>NEK8</i>    | NM_178170.2    |

|                 |                |
|-----------------|----------------|
| <i>NPHP1</i>    | NM_000272.3    |
| <i>NPHP3</i>    | NM_153240.4    |
| <i>NPHP4</i>    | NM_001291593.1 |
| <i>NPHS1</i>    | NM_004646.3    |
| <i>NPHS2</i>    | NM_001297575.1 |
| <i>NUP107</i>   | NM_020401.3    |
| <i>NUP205</i>   | NM_015135.2    |
| <i>NUP93</i>    | NM_014669.4    |
| <i>OFD1</i>     | NM_003611.2    |
| <i>PAX2</i>     | NM_000278.4    |
| <i>PDSS2</i>    | NM_020381.3    |
| <i>PKHD1</i>    | NM_138694.3    |
| <i>PLCE1</i>    | NM_016341.3    |
| <i>PMPCA</i>    | NM_019892.5    |
| <i>PRKCSH</i>   | NM_001001329.2 |
| <i>PTPRO</i>    | NM_002848.3    |
| <i>REN</i>      | NM_000537.3    |
| <i>RET</i>      | NM_020975.5    |
| <i>ROBO2</i>    | NM_002942.4    |
| <i>RPGRIP1L</i> | NM_015272.4    |
| <i>SALL1</i>    | NM_002968.2    |
| <i>SDCCAG8</i>  | NM_006642.4    |
| <i>SEC63</i>    | NM_007214.4    |
| <i>SIX1</i>     | NM_005982.3    |
| <i>SIX2</i>     | NM_016932.4    |
| <i>SIX5</i>     | NM_175875.4    |
| <i>SLC12A1</i>  | NM_000338.2    |
| <i>SLC12A3</i>  | NM_000339.2    |
| <i>SLC34A1</i>  | NM_003052.4    |
| <i>SLC3A1</i>   | NM_000341.3    |
| <i>SLC4A1</i>   | NM_000342.3    |
| <i>SLC7A9</i>   | NM_001126335.1 |
| <i>SLC9A3R1</i> | NM_004252.4    |
| <i>SOX17</i>    | NM_022454.3    |
| <i>TCTN1</i>    | NM_024549.5    |
| <i>TCTN2</i>    | NM_024809.4    |
| <i>TCTN3</i>    | NM_015631.5    |
| <i>THBD</i>     | NM_000361.2    |
| <i>TMEM138</i>  | NM_016464.4    |
| <i>TMEM216</i>  | NM_016499.5    |
| <i>TMEM231</i>  | NM_001077416.2 |
| <i>TMEM237</i>  | NM_152388.3    |
| <i>TMEM67</i>   | NM_153704.5    |
| <i>TRAF3IP1</i> | NM_015650.3    |
| <i>TRIM32</i>   | NM_012210.3    |
| <i>TRPC6</i>    | NM_004621.5    |
| <i>TSC1</i>     | NM_000368.4    |
| <i>TSC2</i>     | NM_000548.4    |

|               |                |
|---------------|----------------|
| <i>TTC21B</i> | NM_024753.4    |
| <i>TTC8</i>   | NM_144596.3    |
| <i>UMOD</i>   | NM_001008389.2 |
| <i>UPK3A</i>  | NM_006953.3    |
| <i>VHL</i>    | NM_000551.3    |
| <i>WDPCP</i>  | NM_015910.6    |
| <i>WDR19</i>  | NM_001317924.1 |
| <i>WT1</i>    | NM_000378.5    |
| <i>ZNF423</i> | NM_015069.4    |
