# Supplementary material for: Results of targeted next-generation sequencing in children with cystic kidney diseases often change the clinical diagnosis
Source: PubMed Central journal article supplement (PMC7310724; doi:10.1371/journal.pone.0235071), 2020-06-23
Supplement: pone.0235071.s003.pdf [file pone.0235071.s003.pdf]

| Panel version number 1 |                              |                              |                              |                              |                              |                               |             |                   |                     |                    |                  |                              |                                |
|------------------------|------------------------------|------------------------------|------------------------------|------------------------------|------------------------------|-------------------------------|-------------|-------------------|---------------------|--------------------|------------------|------------------------------|--------------------------------|
| Sample                 | PCT_TARG<br>ET_BASES<br>_10X | PCT_TARG<br>ET_BASES<br>_20X | PCT_TARG<br>ET_BASES<br>_30X | PCT_TARG<br>ET_BASES<br>_40X | PCT_TARG<br>ET_BASES<br>_50X | PCT_TARG<br>ET_BASES<br>_100X | TOTAL_READS | ON_BAIT_BAS<br>ES | NEAR_BAIT<br>_BASES | OFF_BAIT_BA<br>SES | PCT_OFF_B<br>AIT | MEAN_TAR<br>GET_COVER<br>AGE | MEDIAN_T<br>ARGET_CO<br>VERAGE |
| 01_88512               | 0.986043                     | 0.978481                     | 0.9701                       | 0.958565                     | 0.944627                     | 0.820353                      | 1791240.0   | 132895028.0       | 54997701.0          | 84772126.0         | 0.310902         | 144.675831                   | 149.0                          |
| 02_88412               | 0.985922                     | 0.97937                      | 0.971933                     | 0.96267                      | 0.949991                     | 0.855488                      | 1905015.0   | 141074139.0       | 60271005.0          | 91411002.0         | 0.312243         | 156.364834                   | 159.0                          |
| 06_147912              | 0.988088                     | 0.983652                     | 0.979353                     | 0.974693                     | 0.968848                     | 0.918775                      | 2535499.0   | 185700742.0       | 82164332.0          | 126260535.0        | 0.320356         | 207.255224                   | 200.0                          |
| 08_134013              | 0.988503                     | 0.982872                     | 0.977716                     | 0.971466                     | 0.964273                     | 0.905573                      | 2393991.0   | 180887459.0       | 77387212.0          | 113321323.0        | 0.304958         | 201.044251                   | 200.0                          |
| 10_94312               | 0.986981                     | 0.981383                     | 0.975561                     | 0.967741                     | 0.958907                     | 0.88728                       | 1896584.0   | 140070229.0       | 64034564.0          | 91006114.0         | 0.308379         | 159.118378                   | 163.0                          |
| 11_117812              | 0.992705                     | 0.988887                     | 0.985343                     | 0.981909                     | 0.978184                     | 0.950359                      | 2520432.0   | 202928151.0       | 94922889.0          | 91521738.0         | 0.235049         | 225.060637                   | 200.0                          |
| 12_88612               | 0.986937                     | 0.980511                     | 0.973055                     | 0.964843                     | 0.954897                     | 0.895106                      | 2598645.0   | 196132526.0       | 79496802.0          | 125093968.0        | 0.31217          | 208.961153                   | 200.0                          |
| 13_136012              | 0.987768                     | 0.981948                     | 0.975015                     | 0.963965                     | 0.947668                     | 0.747774                      | 1646876.0   | 119023841.0       | 52293062.0          | 84653969.0         | 0.330717         | 133.371499                   | 130.0                          |
| 14_88712               | 0.990414                     | 0.986183                     | 0.981305                     | 0.976                        | 0.970548                     | 0.905066                      | 1872557.0   | 148696153.0       | 72898243.0          | 67977058.0         | 0.234751         | 169.474523                   | 177.0                          |
| 19_76512               | 0.988393                     | 0.982267                     | 0.975197                     | 0.965891                     | 0.955753                     | 0.873233                      | 1991811.0   | 146411797.0       | 60185082.0          | 94031557.0         | 0.312783         | 157.408126                   | 161.0                          |
| 20_88912               | 0.988872                     | 0.982649                     | 0.975577                     | 0.966524                     | 0.957096                     | 0.885695                      | 2371582.0   | 176692330.0       | 67780691.0          | 116036641.0        | 0.321868         | 182.534007                   | 187.0                          |
| 22_71615               | 0.986802                     | 0.978346                     | 0.967917                     | 0.954358                     | 0.938691                     | 0.733043                      | 1413352.0   | 104840147.0       | 47332470.0          | 66121255.0         | 0.3029           | 120.060344                   | 122.0                          |
| 26_104016              | 0.990963                     | 0.987902                     | 0.983949                     | 0.979601                     | 0.974498                     | 0.931516                      | 2375817.0   | 188210434.0       | 84003180.0          | 90638088.0         | 0.249794         | 203.8827                     | 200.0                          |
| 27_51515               | 0.986567                     | 0.978736                     | 0.96999                      | 0.959694                     | 0.948419                     | 0.838385                      | 1588230.0   | 121085374.0       | 64484687.0          | 60231916.0         | 0.245042         | 142.234584                   | 149.0                          |
| 28_44916               | 0.992172                     | 0.986556                     | 0.981534                     | 0.974999                     | 0.966772                     | 0.865032                      | 1765541.0   | 117467994.0       | 79869698.0          | 71068134.0         | 0.264779         | 146.983224                   | 152.0                          |
| Panel version number 2 |                              |                              |                              |                              |                              |                               |             |                   |                     |                    |                  |                              |                                |
| 30_123818              | 0.992151                     | 0.988947                     | 0.985378                     | 0.980751                     | 0.971852                     | 0.830827                      | 2607217.0   | 70247121.0        | 59969010.0          | 64323253.0         | 0.330644         | 124.654797                   | 128.0                          |
| 31_173718              | 0.997611                     | 0.995822                     | 0.993471                     | 0.990895                     | 0.98763                      | 0.937422                      | 3703952.0   | 99068138.0        | 81487737.0          | 97653848.0         | 0.351008         | 175.432504                   | 180.0                          |
| 32_166818              | 0.995761                     | 0.992987                     | 0.989622                     | 0.985459                     | 0.979855                     | 0.883982                      | 2914182.0   | 73578073.0        | 62328625.0          | 82576834.0         | 0.377954         | 130.322397                   | 132.0                          |

- PCT\_TARGET\_BASES\_10X     The fraction of all target bases achieving 10X or greater coverage.
- PCT\_TARGET\_BASES\_20X     The fraction of all target bases achieving 20X or greater coverage.
- PCT\_TARGET\_BASES\_30X     The fraction of all target bases achieving 30X or greater coverage.
- PCT\_TARGET\_BASES\_40X     The fraction of all target bases achieving 40X or greater coverage.
- PCT\_TARGET\_BASES\_50X     The fraction of all target bases achieving 50X or greater coverage.
- PCT\_TARGET\_BASES\_100X    The fraction of all target bases achieving 100X or greater coverage.
- TOTAL\_READS                The total number of reads in the SAM or BAM file examined.

|                      |                                                                                                                                                 |
|----------------------|-------------------------------------------------------------------------------------------------------------------------------------------------|
| ON_BAIT_BASES        | The number of PF_BASES_ALIGNED that are mapped to the baited regions of the genome.                                                             |
| NEAR_BAIT_BASES      | The number of PF_BASES_ALIGNED that are mapped to within a fixed interval containing a baited region, but not within the baited section per se. |
| OFF_BAIT_BASES       | The number of PF_BASES_ALIGNED that are mapped away from any baited region.                                                                     |
| PCT_OFF_BAIT         | The fraction of PF_BASES_ALIGNED that are mapped away from any baited region, $OFF\_BAIT\_BASES/PF\_BASES\_ALIGNED$ .                           |
| MEAN_TARGET_COVERAGE | The mean coverage of a target region.                                                                                                           |
| MEAN_TARGET_COVERAGE | The mean coverage of a target region.                                                                                                           |
