# Supplementary material for: Results of targeted next-generation sequencing in children with cystic kidney diseases often change the clinical diagnosis
Source: PubMed Central journal article supplement (PMC7310724; doi:10.1371/journal.pone.0235071), 2020-06-23
Supplement: pone.0235071.s004.pdf [file pone.0235071.s004.pdf]

| Patient   | PKHD1 sequencing | Panel sequencing (1): Panel v.1 (2): Panel v.2 | MLPA PKHD1 | MLPA HNF1B | PKD1 sequencing |
|-----------|------------------|------------------------------------------------|------------|------------|-----------------|
| 1/88512   | +                | +(1)                                           | +          | +          | +               |
| 2/88412   | +                | +(1)                                           | +          | +          | +               |
| 3/89313   | +                | -                                              | -          | -          | -               |
| 4/135812  | +                | -                                              | -          | -          | -               |
| 5/117712  | +                | -                                              | -          | -          | -               |
| 6/147912  | +                | +(1)                                           | +          | +          | +               |
| 7/135912  | +                | -                                              | -          | -          | -               |
| 8/134013  | +                | +(1)                                           | +          | +          | +               |
| 9/137113  | +                | -                                              | -          | -          | +               |
| 10/94312  | +                | +(1)                                           | +          | +          | +               |
| 11/117812 | +                | +(1)                                           | +          | +          | +               |
| 12/88612  | +                | +(1)                                           | +          | +          | +               |
| 13/136012 | +                | +(1)                                           | +          | +          | -               |
| 14/88712  | +                | +(1)                                           | +          | +          | +               |
| 15/88812  | +                | -                                              | -          | -          | -               |
| 16/86512  | +                | -                                              | -          | -          | -               |
| 17/86312  | +                | -                                              | -          | -          | -               |
| 18/88312  | +                | -                                              | -          | -          | -               |
| 19/76512  | +                | +(1)                                           | +          | +          | +               |
| 20/88912  | +                | +(1)                                           | +          | +          | +               |
| 21/86412  | +                | -                                              | -          | -          | -               |
| 22/71615  | +                | +(1)                                           | +          | +          | +               |
| 23/37815  | +                | -                                              | -          | -          | -               |
| 24/09416  | +                | Commercial lab                                 | +          | -          | -               |
| 25/104016 | -                | +(1)                                           | -          | -          | +               |
| 26/51515  | -                | +(1)                                           | -          | -          | +               |
| 27/44916  | -                | +(1)                                           | -          | -          | +               |
| 28/118418 | -                | -                                              | -          | -          | +               |
| 29/123818 | -                | +(2)                                           | -          | -          | -               |
| 30/173718 | -                | +(2)                                           | -          | -          | -               |
| 31/166818 | -                | +(2)                                           | -          | -          | +               |
